# Supplementary material
Source: Research Square preprint supplement (doi:10.21203/rs.3.rs-9204155/v2)

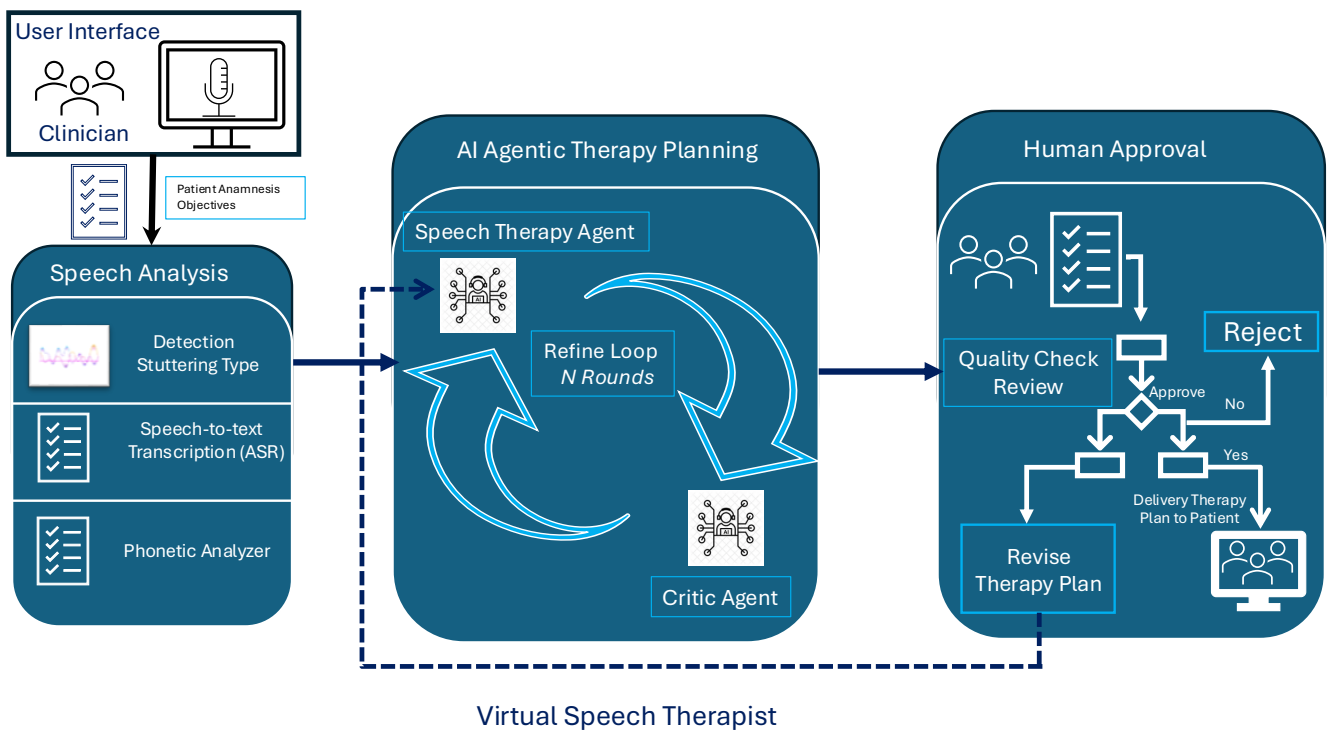

Supplement: Supplementary file 1 [file p1.pdf › sn-article-template/p1.pdf]
